# Supplementary material
Source: publisher figshare collection journal article supplement (https://frontiersin.figshare.com/ndownloader/files/34523894)
Supplement: Supplementary file 1 [file 34523894]

| Core ID        | Latitude    | Longitude    | Water depth<br>(m) | Collection date |
|----------------|-------------|--------------|--------------------|-----------------|
| BG19 S1-2      | 33°16.395'N | 131°32.396'E | 68.9               | Sep. 10 2019    |
| BG10-3-1       | 33°16.407'N | 131°32.190'E | 70.6               | Sep. 10 2010    |
| KT-09-1 BP09-6 | 33°16.429'N | 131°32.196'E | 70.6               | Mar. 8 2009     |
